# Supplementary material
Source: PubMed Central journal article supplement (PMC1750866)

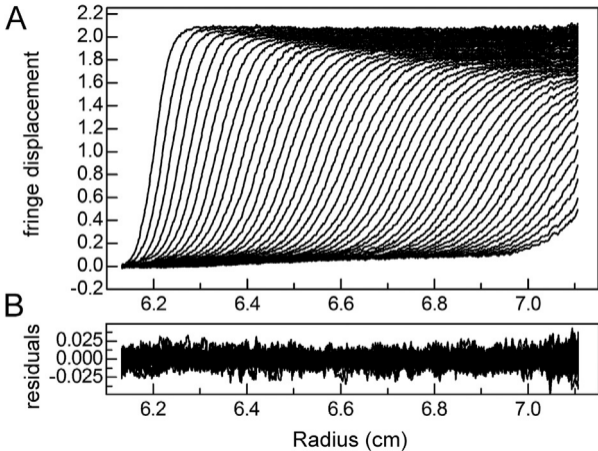

Supplement: pnas_0609283103_1.pdf [file pnas_0609283103_1.pdf]

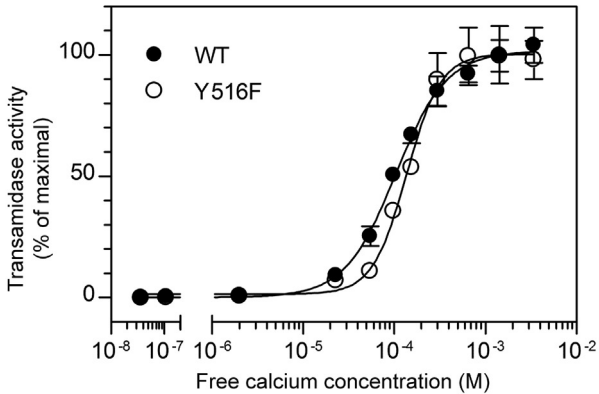

Supplement: pnas_0609283103_2.pdf [file pnas_0609283103_2.pdf]

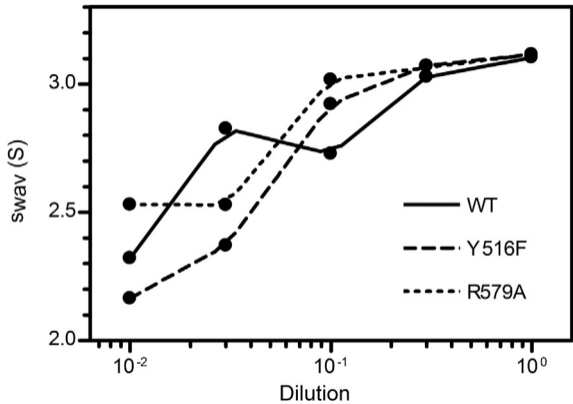

Supplement: pnas_0609283103_3.pdf [file pnas_0609283103_3.pdf]
